# Supplementary material for: An Assessment Of Health Risks Posed By Consumption Of Pesticide Residues In Fruits And Vegetables Among Residents In The Kampala Metropolitan Area In Uganda
Source: Research Square preprint supplement (doi:10.21203/rs.3.rs-1338563/v1), 2022-02-10
Supplement: Supplementary file 1 [file eb91fb67d5fa67a397213313.docx]

**Table A1: Pesticide active ingredients analysed in fruits and vegetables categorized by class, use and WHO classification.**

| **Pesticide Active Ingredient** | **Class** | **Main Use** | **WHO classification** |
| --- | --- | --- | --- |
| Dithiocarbamates | Diothiocarbamates | I | O |
| Omethoate | OP | I | Ib |
| Methamidophos | OP | I | Ib |
| Acephate | OP | I | II |
| Monocrotophos | OP | I | Ib |
| Vamidothion | OP | I | Ib |
| Dimethoate | OP | I | II |
| Mevinphos | OP | I | Ia |
| Phosphamidon | OP | I | Ia |
| Fonofos | OP | I | O |
| Azamethiphos | OP | I | II |
| Dichlorvos | OP | I | Ib |
| Malaoxon | OP | I | Ib |
| Methidathion | OP | I | Ib |
| Azinphosmethyl | OP | I | Ib |
| Malathion | OP | I | III |
| Methacrifos | OP | I | II |
| Propetamophos | OP | I | II |
| Triazophos | OP | I | Ib |
| Mecarbam | OP | I | Ib |
| Azinphosethyl | OP | I | Ib |
| Isofenphosmethyl | OP | I | Ib |
| Ethoprophos | OP | I | Ia |
| Fenamiphos | OP | N | Ib |
| Quinalphos | OP | I | II |
| Coumaphos | OP | AC | Ib |
| Chlorfenvinphos | OP | I | Ib |
| Chlorpyriphos-methyl | OP | I | II |
| Temephos | OP | I | III |
| Profenofos | OP | I | II |
| Terbufos | OP | I | Ia |
| Ethion | OP | I | II |
| Phosalone | OP | I | II |
| Pirimiphosmethyl | OP | I | II |
| Fenitrothion | OP | I | II |
| Chlorpyriphos | OP | I | II |
| Diazinon | OP | I | II |
| Aminocarb | C | I | II |
| Methomyl | C | I | Ib |
| Aldicarb | C | I | Ia |
| Butocarboxim | C | I | Ib |
| Aldicarbfragment | C | I | Ia |
| Pirimicarb | C | I | II |
| Dioxacarb | C | I | O |
| Carbaryl | C | I | II |
| Carbofuran | C | I | Ib |
| Thiodicarb | C | I | II |
| Methiocarb Mercaptodimethur | C | I | Ib |
| Alanycarb | C | I | II |
| Benfuracarb | C | I | II |
| Carbosulfan | C | I | II |
| Methiocarb | C | I | Ib |
| Imidacloprid | N | I | II |
| Acetamiprid | N | I | II |
| Thiacloprid | N | I | II |
| Bifenthrin | PY | I | II |
| LambdaCyhalothrin | PY | I | II |
| Deltamethrin | PY | I | II |
| Cypermethrin | PY | I | II |
| Ethirimol | O (Pyrimidinol) | F | U |
| Glyphosate | O (Phosphonoglycine) | H | III |
| Carbendazim | O (Benzimidazole) | F | U |
| Carboxin | O (Oxathiin) | F | III |
| Imazalil | O (Imidazole | F | II |
| Diuron | O (Phenylamide) | H | III |
| Metazachlor | O (Chloroacetamide) | H | III |
| Metalaxyl | O (Phenylamide) | F | III |
| Azaconazole | O (Triazole) | F | II |
| Dimethachlor | O (Chloroacetamide) | H | II |
| Clomazone | O (Isoxazolidinone) | H | II |
| Azoxystrobin | O (Strobilurin) | F | U |
| Pyrimethanil | O ( Anilinopyrimidine | F | U |
| Fludioxonil | O (Phenylpyrrole) | F | U |
| BosclidNicobifen | O (Carboxamide) | F | U |
| Triadimenol | O (Triazole) | F | II |
| Spirotetramat | O (Tetramic acid) | I | III |
| Fenhexamid | O (Hydroxyanilide) | F | U |
| Fenarimol | O (Pyrimidine) | F | III |
| Fipronil | O (Phenylpyrazole) | I | II |
| Bupirimate | O (Pyrimidinol) | F | III |
| Flubendiamide | O (Benzene-dicarboxamide) | I | O |
| Metolachlor | O (Chloroacetamide) | H | III |
| Cyprodinil | O (Anilinopyrimidine) | F | O |
| Benalaxyl | O (Acylamino acid) | F | III |
| Prochloraz | O (Imidazole | F | II |
| Metconazole | O (Triazole) | F | II |
| Fluazifop | O (Aryloxyphenoxypropionate) | H | O |
| Diniconazole | O (Triazole) | F | II |
| Flufenoxuron | O ( Benzoylurea) | I | III |
| Pyriproxyfen | O (Unclassified) | I | U |
| Quinoxyfen | O (Quinoline) | F | U |
| Proquinazid | O (Quinazolinone) | F | U |
| Fenazaquin | O (Quinazoline) | AC | II |

*OP – Organophosphate, C – Carbamate, N – Neonicotinoids, PY – Pyrethroids, O – Others, I – Insecticide, F – Fungicide, H – Herbicide, AC – Acaricide, O – Obsolete, Ia – Extremely hazardous, Ib – Highly hazardous, II – Moderately hazardous, III – Slightly hazardous, U – Unlikely to present acute hazards*

**Table A2: Hazard quotient for pesticides with EDI greater than the ADI at different stages along the chain**

| **Pesticides** | **Hazard Quotient (HQ)** | | | | |
| --- | --- | --- | --- | --- | --- |
| **Farm** | **Market** | **Street** | **Restaurant** | **Home** |
| Omethoate | 0.002 | 1.2 | BDL | 1.2 | 0.001 |
| Dimethoate | BDL | 1.5 | BDL | BDL | BDL |
| Fonofos | 27.5 | 29.5 | 0.2 | 39.3 | 13.8 |
| Dichlorvos | 442.6 | 7.4 | 4.4 | 22.1 | 36.9 |
| Quinalphos | 0.1 | 0.5 | 0.4 | 1.2 | 0.6 |
| Profenofos | 3.9 | 1.4 | 1.2 | 2.0 | 0.1 |
| Fenitrothion | 23.6 | 10.6 | 47.2 | 35.4 | 4.7 |
| Dioxacarb | 29.5 | 23.6 | 17.7 | BDL | BDL |
| Carbofuran | 0.03 | 0.004 | 2.0 | 1.6 | 0.002 |
| Alanycarb | 118.0 | 118.0 | 59.0 | 118.0 | 177.0 |
| Benfuracarb | 23.6 | 4.7 | 1.8 | 4.7E-11 | 1.8 |
| Acetamiprid | 1.7 | 0.9 | 0.5 | 0.5 | 0.2 |
| Cypermethrin | 2.6 | 1.1 | 3.0 | 0.7 | 0.4 |
| Fenhexamid | 0.6 | 0.9 | 1.8 | 0.03 | 0.2 |
| Fluazifop | 0.1 | 5.9 | BDL | BDL | BDL |

BDL – Below Detection Limit, HQ – Hazard Quotient

**Table 3A: Hazard quotient for pesticides with EDI greater than the ADI by age group**

| **Pesticides** | **Hazard Quotient (HQ) by age group (years)** | | | | | | |
| --- | --- | --- | --- | --- | --- | --- | --- |
| **<5** | **05-12** | **13-19** | **20-24** | **25-35** | **36-49** | **50+** |
| Omethoate | 1.6 | 0.9 | 0.6 | 0.6 | 0.5 | 0.4 | 0.5 |
| Dimethoate | 1.2 | 0.7 | 0.4 | 0.5 | 0.4 | 0.3 | 0.4 |
| Fonofos | 68.2 | 38.8 | 24.0 | 27.6 | 22.5 | 19.4 | 20.9 |
| Dichlorvos | 444.3 | 253.1 | 156.5 | 180.2 | 146.5 | 126.5 | 136.2 |
| Quinalphos | 1.3 | 0.7 | 0.5 | 0.5 | 0.4 | 0.4 | 0.4 |
| Profenofos | 5.6 | 3.2 | 2.0 | 2.3 | 1.8 | 1.6 | 1.7 |
| Fenitrothion | 62.1 | 35.4 | 21.9 | 25.2 | 20.5 | 17.7 | 19.1 |
| Aminocarb | 2.6 | 1.5 | 0.9 | 1.1 | 0.9 | 0.7 | 0.8 |
| Dioxacarb | 55.1 | 31.4 | 19.4 | 22.4 | 18.2 | 15.7 | 16.9 |
| Carbofuran | 1.1 | 0.6 | 0.4 | 0.4 | 0.4 | 0.3 | 0.3 |
| Alanycarb | 314.3 | 179.0 | 110.74 | 127.5 | 103.6 | 89.5 | 96.4 |
| Benfuracarb | 24.8 | 14.1 | 8.7 | 10.1 | 8.2 | 7.1 | 7.6 |
| Methiocarb | 1.3 | 0.7 | 0.5 | 0.5 | 0.4 | 0.4 | 0.4 |
| Acetamiprid | 2.5 | 1.4 | 0.9 | 1.0 | 0.8 | 0.7 | 0.8 |
| Lambda-Cyhalothrin | 2.3 | 1.3 | 0.8 | 0.9 | 0.8 | 0.7 | 0.7 |
| Cypermethrin | 4.7 | 2.7 | 1.7 | 1.9 | 1.6 | 1.3 | 1.5 |
| Fenhexamid | 1.9 | 1.1 | 0.7 | 0.8 | 0.6 | 0.5 | 0.6 |
| Fluazifop | 4.6 | 2.8 | 1.7 | 2.0 | 1.6 | 1.4 | 1.5 |

HQ – Hazard Quotient
